# Supplementary material
Source: HighWire-hosted journal article supplement (https://www.annfammed.org/highwire/filestream/8802/field_highwire_adjunct_files/0/Hodge_Supp_App.pdf)
Supplement: Hodge_Supp_App.pdf [file Hodge_Supp_App.pdf]

## **Supplemental material for**

Hodge B, Crane S. Engaging complex patients with drop-in group medical appointments. *Ann Fam Med*. 2017;15(3):279.

Bryan Hodge, DO

Steven Crane, MD

MAHEC-Hendersonville Rural Family Medicine Residency Program,  
Hendersonville, North Carolina

**Funding support:** MAHEC, The Free Clinics, Kate B. Reynolds Grant, Blue Ridge Community Health, Community Care of Western North Carolina

**Prior presentations:** Hodge, B, Bridging Healthcare: An Innovative Model to Improve Outcomes and Decrease Cost for Difficult Health Care Cohorts. STFM Conference on Practice Improvement Presentation. December 2012.

Crane S, Collins L, Hall J, et al. Reducing utilization by uninsured frequent users of the emergency department: combining case management and drop-in group medical appointments. *J Am Board Fam Med*. 2012. 25(2):184-91.
